# Supplementary material for: Departing from four points: Psychometric implications of modifying response scale width for the PHQ-9 in repeated measurements
Source: Research Square preprint supplement (doi:10.21203/rs.3.rs-7107242/v1), 2025-08-04
Supplement: Supplementary file 1 [file eaf4eb3f638fa1d6cf69e897.docx]

Supplementary statistical analyses

**Departing from four points: Psychometric implications of modifying response scale width for the PHQ-9 in repeated measurements**

Milana Damjenić Mihaldžić1, Siniša Subotić2 and Gregor Sočan3

1Faculty of Philosophy, University of Banja Luka, Banja Luka, 78000 Bosnia and Herzegovina and Faculty of Arts, University of Ljubljana, Ljubljana, Slovenia

2Department of Psychology and Faculty of Natural Sciences and Mathematics, University of Banja Luka, Banja Luka, Bosnia and Herzegovina

3Faculty of Arts, University of Ljubljana, Ljubljana, Slovenia

Supplemental Table 1 Cohen’s d effect sizes and Welch’s t-test results for PHQ-9 raw scores means comparisons across NROs

| Response scale width  (Scale 1 - Scale 2) | | M1 | M2 | MΔ | SD1 | SD2 | dCohen | twelch | p | pBH |
| --- | --- | --- | --- | --- | --- | --- | --- | --- | --- | --- |
| 3 | 2 | 4.83 | 2.57 | 2.27 | 3.87 | 2.47 | 0.70 | 10.453 | **< 0.001** | **< 0.001** |
| 4 | 2 | 7.07 | 2.57 | 4.50 | 5.44 | 2.47 | 1.06 | 16.080 | **< 0.001** | **< 0.001** |
| 4 | 3 | 7.07 | 4.83 | 2.24 | 5.44 | 3.87 | 0.47 | 7.137 | **< 0.001** | **< 0.001** |
| 5 | 2 | 9.33 | 2.57 | 6.76 | 7.59 | 2.47 | 1.20 | 18.046 | **< 0.001** | **< 0.001** |
| 5 | 4 | 9.33 | 4.83 | 4.50 | 7.59 | 3.87 | 0.75 | 11.233 | **< 0.001** | **< 0.001** |
| 5 | 4 | 9.33 | 7.07 | 2.26 | 7.59 | 5.44 | 0.34 | 5.160 | **< 0.001** | **< 0.001** |
| 6 | 2 | 11.50 | 2.57 | 8.93 | 9.32 | 2.47 | 1.31 | 19.791 | **< 0.001** | **< 0.001** |
| 6 | 3 | 11.50 | 4.83 | 6.66 | 9.32 | 3.87 | 0.93 | 14.096 | **< 0.001** | **< 0.001** |
| 6 | 4 | 11.50 | 7.07 | 4.42 | 9.32 | 5.44 | 0.58 | 8.764 | **< 0.001** | **< 0.001** |
| 6 | 5 | 11.50 | 9.33 | 2.16 | 9.32 | 7.59 | 0.26 | 3.844 | **< 0.001** | **< 0.001** |
| 7 | 2 | 13.84 | 2.57 | 11.27 | 11.50 | 2.47 | 1.35 | 20.534 | **< 0.001** | **< 0.001** |
| 7 | 3 | 13.84 | 4.83 | 9.01 | 11.50 | 3.87 | 1.04 | 15.891 | **< 0.001** | **< 0.001** |
| 7 | 4 | 13.84 | 7.07 | 6.77 | 11.50 | 5.44 | 0.75 | 11.396 | **< 0.001** | **< 0.001** |
| 7 | 5 | 13.84 | 9.33 | 4.51 | 11.50 | 7.59 | 0.46 | 6.999 | **< 0.001** | **< 0.001** |
| 7 | 6 | 13.84 | 11.50 | 2.34 | 11.50 | 9.32 | 0.22 | 3.389 | **0.001** | **0.001** |
| 8 | 7 | 15.50 | 13.84 | 1.66 | 12.92 | 11.50 | 0.14 | 2.057 | **0.040** | 0.069 |
| 9 | 8 | 17.33 | 15.50 | 1.83 | 15.37 | 12.92 | 0.13 | 1.928 | 0.054 | 0.088 |
| 10 | 9 | 19.08 | 17.33 | 1.75 | 17.01 | 15.37 | 0.11 | 1.613 | 0.107 | 0.162 |
| 11 | 10 | 21.84 | 19.08 | 2.77 | 19.12 | 17.01 | 0.15 | 2.285 | **0.023** | **0.042** |
| 12 | 11 | 23.57 | 21.84 | 1.73 | 21.39 | 19.12 | 0.09 | 1.275 | 0.203 | 0.263 |
| 13 | 12 | 25.61 | 23.57 | 2.04 | 22.99 | 21.39 | 0.09 | 1.372 | 0.170 | 0.233 |
| 14 | 13 | 27.14 | 25.61 | 1.53 | 24.71 | 22.99 | 0.06 | 0.960 | 0.337 | 0.381 |
| 15 | 14 | 27.97 | 27.14 | 0.83 | 26.37 | 24.71 | 0.03 | 0.488 | 0.626 | 0.626 |
| 16 | 15 | 30.90 | 27.97 | 2.93 | 29.05 | 26.37 | 0.11 | 1.590 | 0.112 | 0.162 |
| 17 | 16 | 32.49 | 30.90 | 1.59 | 30.34 | 29.05 | 0.05 | 0.803 | 0.422 | 0.439 |
| 18 | 17 | 34.55 | 32.49 | 2.06 | 32.14 | 30.34 | 0.07 | 0.997 | 0.319 | 0.377 |
| 19 | 18 | 36.83 | 34.55 | 2.28 | 34.62 | 32.14 | 0.07 | 1.033 | 0.302 | 0.374 |
| 20 | 19 | 38.81 | 36.83 | 1.97 | 37.24 | 34.62 | 0.06 | 0.825 | 0.410 | 0.439 |

*Notes.* Comprehensive comparisons were made up to 7-point scales, and only consecutive comparisons were made beyond 7 points. pBH - p value with Benjamini-Hochberg correction, p < .05 (significant) is in bold text. Transformed scales showed no significant differences.

Supplemental Table 2 Comparison of percentage of participants above cutoff across NROs

| Response scale width  (Scale 1 - Scale 2) | | %above cutoff.1 | %above cutoff.2 | %Δ | pFisher.exact | pFisher.exact.BH |
| --- | --- | --- | --- | --- | --- | --- |
|
| 3 | 2 | 36.9 | 44.4 | -7.46 | **0.025** | 0.176 |
| 4 | 2 | 40.1 | 44.4 | -4.24 | 0.203 | 0.719 |
| 4 | 3 | 40.1 | 36.9 | 3.22 | 0.339 | 0.719 |
| 5 | 2 | 34.8 | 44.4 | -9.57 | **0.004** | **0.049** |
| 5 | 3 | 34.8 | 36.9 | -2.11 | 0.532 | 0.719 |
| 5 | 4 | 34.8 | 40.1 | -5.33 | 0.101 | 0.47 |
| 6 | 2 | 34.4 | 44.4 | -10.02 | **0.002** | **0.049** |
| 6 | 3 | 34.4 | 36.9 | -2.56 | 0.445 | 0.719 |
| 6 | 4 | 34.4 | 40.1 | -5.78 | 0.075 | 0.422 |
| 6 | 5 | 34.4 | 34.8 | -0.45 | 0.889 | 0.958 |
| 7 | 2 | 36.7 | 44.4 | -7.63 | **0.022** | 0.176 |
| 7 | 3 | 36.7 | 36.9 | -0.17 | 1.000 | 1.000 |
| 7 | 4 | 36.7 | 40.1 | -3.39 | 0.308 | 0.719 |
| 7 | 5 | 36.7 | 34.8 | 1.94 | 0.581 | 0.719 |
| 7 | 6 | 36.7 | 34.4 | 2.38 | 0.49 | 0.719 |
| 8 | 7 | 34.9 | 36.7 | -1.87 | 0.582 | 0.719 |
| 9 | 8 | 32.5 | 34.9 | -2.36 | 0.481 | 0.719 |
| 10 | 9 | 30.7 | 32.5 | -1.79 | 0.614 | 0.719 |
| 11 | 10 | 34.2 | 30.7 | 3.43 | 0.284 | 0.719 |
| 12 | 11 | 32.4 | 34.2 | -1.79 | 0.571 | 0.719 |
| 13 | 12 | 34.5 | 32.4 | 2.17 | 0.523 | 0.719 |
| 14 | 13 | 30.6 | 34.5 | -3.93 | 0.226 | 0.719 |
| 15 | 14 | 28.2 | 30.6 | -2.37 | 0.466 | 0.719 |
| 16 | 15 | 31.4 | 28.2 | 3.19 | 0.31 | 0.719 |
| 17 | 16 | 30.1 | 31.4 | -1.33 | 0.719 | 0.805 |
| 18 | 17 | 31.7 | 30.1 | 1.65 | 0.616 | 0.719 |
| 19 | 18 | 30.0 | 31.7 | -1.72 | 0.616 | 0.719 |
| 20 | 19 | 29.7 | 30.0 | -0.31 | 0.942 | 0.977 |

*Notes*."pFisher.exact" shows unadjusted p-values from Fisher’s Exact test, while "pFisher.exact.BH" shows these p-values after Benjamini-Hochberg correction for multiple comparisons (p significant at <.05, shown in bold).

Supplemental Table 3 Comparison of omega total coefficients across NROs

| Response scale width  (Scale 1 - Scale 2) | | Ωboot.meanΔ | 95% CI | | p | pBH |
| --- | --- | --- | --- | --- | --- | --- |
| Lower | Upper |
| 3 | 2 | .025 | –.011 | .062 | .177 | .430 |
| 4 | 2 | .045 | .013 | .077 | **.004** | **.018** |
| 4 | 3 | .020 | –.010 | .051 | .184 | .430 |
| 5 | 2 | .075 | .045 | .107 | **.000** | **.000** |
| 5 | 3 | .050 | .024 | .079 | **.000** | **.000** |
| 5 | 4 | .030 | .006 | .054 | **.016** | **.050** |
| 6 | 2 | .073 | .043 | .105 | **.000** | **.000** |
| 6 | 3 | .048 | .021 | .078 | **.000** | **.000** |
| 6 | 4 | .028 | .004 | .053 | **.025** | .069 |
| 6 | 5 | –.002 | –.023 | .020 | .884 | .975 |
| 7 | 2 | .078 | .048 | .110 | **.000** | **.000** |
| 7 | 3 | .053 | .026 | .082 | **.000** | **.000** |
| 7 | 4 | .033 | .008 | .058 | **.007** | **.024** |
| 7 | 5 | .003 | –.018 | .024 | .798 | .975 |
| 7 | 6 | .005 | –.017 | .027 | .691 | .975 |
| 8 | 7 | –.003 | –.025 | .018 | .759 | .975 |
| 9 | 8 | .012 | –.008 | .032 | .242 | .522 |
| 10 | 9 | .000 | –.019 | .020 | .975 | .975 |
| 11 | 10 | .001 | –.021 | .019 | .935 | .975 |
| 12 | 11 | .004 | –.015 | .023 | .688 | .975 |
| 13 | 12 | –.003 | –.023 | .017 | .762 | .975 |
| 14 | 13 | –.001 | –.021 | .019 | .926 | .975 |
| 15 | 14 | .006 | –.014 | .025 | .577 | .975 |
| 16 | 15 | .001 | –.018 | .020 | .915 | .975 |
| 17 | 16 | –.005 | –.024 | .014 | .604 | .975 |
| 18 | 17 | –.002 | –.023 | .018 | .891 | .975 |
| 19 | 18 | .006 | –.013 | .026 | .536 | .975 |
| 20 | 19 | –.001 | –.020 | .018 | .968 | .975 |

*Notes.* pBH - p value with Benjamini-Hochberg correction, p < .05 (significant) is in bold text.

Supplemental Table 4 Comparison of omega categorical coefficients across NROs

| Response scale width  (Scale 1 - Scale 2) | | Ωboot.meanΔ | 95% CI | | p | pBH |
| --- | --- | --- | --- | --- | --- | --- |
| Lower | Upper |
| 3 | 2 | .025 | –.012 | .062 | .197 | .358 |
| 4 | 2 | .044 | .010 | .079 | **.014** | **.035** |
| 4 | 3 | .019 | –.013 | .052 | .235 | .391 |
| 5 | 2 | .076 | .043 | .109 | **.000** | **.000** |
| 5 | 3 | .051 | .021 | .081 | **.000** | **.000** |
| 5 | 4 | .032 | .005 | .059 | **.021** | **.046** |
| 6 | 2 | .069 | .036 | .104 | **.000** | **.000** |
| 6 | 3 | .044 | .014 | .075 | **.004** | **.012** |
| 6 | 4 | .025 | –.003 | .052 | .086 | .172 |
| 6 | 5 | –.007 | –.032 | .018 | .601 | .707 |
| 7 | 2 | .079 | .046 | .113 | **.000** | **.000** |
| 7 | 3 | .054 | .024 | .085 | **.000** | **.000** |
| 7 | 4 | .035 | .007 | .063 | **.013** | **.035** |
| 7 | 5 | .003 | –.022 | .029 | .821 | .912 |
| 7 | 6 | .010 | –.015 | .036 | .440 | .587 |
| 8 | 7 | .002 | –.025 | .028 | .916 | .964 |
| 9 | 8 | .008 | –.018 | .034 | .543 | .679 |
| 10 | 9 | –.010 | –.033 | .013 | .396 | .587 |
| 11 | 10 | .000 | –.022 | .022 | .997 | .997 |
| 12 | 11 | .010 | –.014 | .034 | .415 | .587 |

| *Notes.* pBH - p value with Benjamini-Hochberg correction, p < .05 (significant) is in bold text. |
| --- |

Supplemental Table 5 Comparison of test-retest reliability coefficients across NROs

| Response scale width  (Scale 1 - Scale 2) | | r1 | r2 | zFisher | pFisher | pFisher.BH | 95% CI Zou* | |
| --- | --- | --- | --- | --- | --- | --- | --- | --- |
| Lower | Upper |
| 3 | 2 | .708 | .693 | 0.443 | .658 | .892 | -.052 | .082 |
| 4 | 2 | .734 | .693 | 1.282 | .200 | .800 | -.022 | .107 |
| 4 | 3 | .734 | .708 | 0.834 | .404 | .892 | -.036 | .090 |
| 5 | 2 | .775 | .693 | 2.691 | **.007** | .200 | **.022** | **.144** |
| 5 | 3 | .775 | .708 | 2.239 | **.025** | .299 | **.008** | **.127** |
| 5 | 4 | .775 | .734 | 1.413 | .158 | .736 | -.016 | .097 |
| 6 | 2 | .731 | .693 | 1.165 | .244 | .854 | -.026 | .103 |
| 6 | 3 | .731 | .708 | 0.718 | .473 | .892 | -.040 | .087 |
| 6 | 4 | .731 | .734 | -0.117 | .906 | .908 | -.064 | .057 |
| 6 | 5 | .731 | .775 | -1.531 | .126 | .704 | -.101 | .012 |
| 7 | 2 | .760 | .693 | 2.144 | **.032** | .299 | **.006** | **.130** |
| 7 | 3 | .760 | .708 | 1.693 | .091 | .634 | -.008 | .113 |
| 7 | 4 | .760 | .734 | 0.861 | .389 | .892 | -.032 | .083 |
| 7 | 5 | .760 | .775 | -0.556 | .578 | .892 | -.069 | .038 |
| 7 | 6 | .760 | .731 | 0.979 | .327 | .892 | -.029 | .087 |
| 8 | 7 | .750 | .760 | -0.352 | .725 | .892 | -.066 | .046 |
| 9 | 8 | .772 | .750 | 0.792 | .428 | .892 | -.033 | .078 |
| 10 | 9 | .746 | .772 | -0.920 | .357 | .892 | -.083 | .030 |
| 11 | 10 | .762 | .746 | 0.572 | .567 | .892 | -.040 | .074 |
| 12 | 11 | .758 | .762 | -0.147 | .883 | .908 | -.060 | .052 |
| 13 | 12 | .771 | .758 | 0.461 | .645 | .892 | -.042 | .068 |
| 14 | 13 | .761 | .771 | -0.341 | .733 | .892 | -.064 | .045 |
| 15 | 14 | .757 | .761 | -0.166 | .868 | .908 | -.060 | .051 |
| 16 | 15 | .761 | .757 | 0.138 | .890 | .908 | -.052 | .060 |
| 17 | 16 | .764 | .761 | 0.115 | .908 | .908 | -.052 | .058 |
| 18 | 17 | .778 | .764 | 0.507 | .612 | .892 | -.039 | .067 |
| 19 | 18 | .790 | .778 | 0.467 | .640 | .892 | -.038 | .063 |
| 20 | 19 | .799 | .790 | 0.397 | .692 | .892 | -.039 | .058 |

*Notes*. *shows Zou's confidence intervals for correlation differences (significant when zero falls outside the interval, shown in bold). "pFisher" shows unadjusted p-values from Fisher's r-to-z transformation test, while "pFisher.BH" shows these p-values after Benjamini-Hochberg correction for multiple comparisons (p significant at <.05, shown in bold).

Supplemental Table 6 Comparison of PHQ-9 correlations across NROs with concurrent CESD-R-10

| Response scale width  (Scale 1 - Scale 2) | | r1 | r2 | zFisher | pFisher | pFisher.BH | 95% CI Zou* | |
| --- | --- | --- | --- | --- | --- | --- | --- | --- |
| Lower | Upper |
| 3 | 2 | .862 | .815 | 2.379 | **.017** | .096 | **.008** | **.087** |
| 4 | 2 | .863 | .815 | 2.492 | **.013** | .089 | **.010** | **.089** |
| 4 | 3 | .863 | .862 | 0.100 | .920 | .976 | -.032 | .036 |
| 5 | 2 | .895 | .815 | 4.584 | **.000** | **.000** | **.045** | **.118** |
| 5 | 3 | .895 | .862 | 2.188 | **.029** | .096 | **.003** | **.064** |
| 5 | 4 | .895 | .863 | 2.098 | **.036** | .099 | **.002** | **.062** |
| 6 | 2 | .894 | .815 | 4.557 | **.000** | **.000** | **.045** | **.117** |
| 6 | 3 | .894 | .862 | 2.157 | **.031** | .096 | **.003** | **.064** |
| 6 | 4 | .894 | .863 | 2.067 | **.039** | .099 | **.002** | **.062** |
| 6 | 5 | .894 | .895 | -0.034 | .973 | .976 | -.027 | .026 |
| 7 | 2 | .896 | .815 | 4.719 | **.000** | **.000** | **.047** | **.119** |
| 7 | 3 | .896 | .862 | 2.314 | **.021** | .096 | **.005** | **.066** |
| 7 | 4 | .896 | .863 | 2.225 | **.026** | .096 | **.004** | **.063** |
| 7 | 5 | .896 | .895 | 0.120 | .905 | .976 | -.024 | .028 |
| 7 | 6 | .896 | .894 | 0.154 | .877 | .976 | -.024 | .028 |
| 8 | 7 | .899 | .896 | 0.227 | .821 | .976 | -.022 | .028 |
| 9 | 8 | .899 | .899 | -0.030 | .976 | .976 | -.026 | .025 |
| 10 | 9 | .892 | .899 | -0.505 | .614 | .976 | -.033 | .019 |
| 11 | 10 | .900 | .892 | 0.611 | .541 | .976 | -.018 | .034 |
| 12 | 11 | .906 | .900 | 0.455 | .649 | .976 | -.019 | .030 |
| 13 | 12 | .904 | .906 | -0.202 | .840 | .976 | -.027 | .022 |
| 14 | 13 | .899 | .904 | -0.353 | .724 | .976 | -.029 | .020 |
| 15 | 14 | .894 | .899 | -0.427 | .669 | .976 | -.032 | .020 |
| 16 | 15 | .904 | .894 | 0.798 | .425 | .850 | -.015 | .036 |
| 17 | 16 | .914 | .904 | 0.900 | .368 | .793 | -.012 | .034 |
| 18 | 17 | .900 | .914 | -1.179 | .238 | .556 | -.037 | .009 |
| 19 | 18 | .899 | .900 | -0.091 | .927 | .976 | -.026 | .024 |
| 20 | 19 | .891 | .899 | -0.582 | .561 | .976 | -.034 | .018 |

*Notes*. *shows Zou's confidence intervals for correlation differences (significant when zero falls outside the interval, shown in bold). "pFisher" shows unadjusted p-values from Fisher's r-to-z transformation test, while "pFisher.BH" shows these p-values after Benjamini-Hochberg correction for multiple comparisons (p significant at <.05, shown in bold).

Supplemental Table 7 Comparison of PHQ-9 correlations across NROs with baseline CESD-R-10

| Response scale width  (Scale 1 - Scale 2) | | r1 | r2 | zFisher | pFisher | pFisher.BH | 95% CI Zou* | |
| --- | --- | --- | --- | --- | --- | --- | --- | --- |
| Lower | Upper |
| 3 | 2 | .674 | .644 | 0.801 | .423 | .917 | -.044 | .105 |
| 4 | 2 | .700 | .644 | 1.557 | .119 | .669 | -.015 | .129 |
| 4 | 3 | .700 | .674 | 0.750 | .453 | .917 | -.043 | .096 |
| 5 | 2 | .733 | .644 | 2.549 | **.011** | .247 | **.020** | **.159** |
| 5 | 3 | .733 | .674 | 1.739 | .082 | .669 | -.007 | .126 |
| 5 | 4 | .733 | .700 | 0.995 | .320 | .917 | -.031 | .096 |
| 6 | 2 | .687 | .644 | 1.164 | .244 | .855 | -.029 | .116 |
| 6 | 3 | .687 | .674 | 0.358 | .721 | .917 | -.058 | .083 |
| 6 | 4 | .687 | .700 | -0.395 | .693 | .917 | -.081 | .054 |
| 6 | 5 | .687 | .733 | -1.390 | .165 | .768 | -.111 | .019 |
| 7 | 2 | .727 | .644 | 2.373 | **.018** | .247 | **.014** | **.153** |
| 7 | 3 | .727 | .674 | 1.561 | .119 | .669 | -.013 | .120 |
| 7 | 4 | .727 | .700 | 0.814 | .416 | .917 | -.037 | .091 |
| 7 | 5 | .727 | .733 | -0.185 | .854 | .917 | -.067 | .055 |
| 7 | 6 | .727 | .687 | 1.210 | .226 | .855 | -.025 | .106 |
| 8 | 7 | .698 | .727 | -0.897 | .370 | .917 | -.094 | .035 |
| 9 | 8 | .714 | .698 | 0.479 | .632 | .917 | -.050 | .082 |
| 10 | 9 | .710 | .714 | -0.104 | .917 | .917 | -.069 | .062 |
| 11 | 10 | .724 | .710 | 0.430 | .667 | .917 | -.050 | .078 |
| 12 | 11 | .720 | .724 | -0.130 | .897 | .917 | -.067 | .059 |
| 13 | 12 | .726 | .720 | 0.200 | .841 | .917 | -.057 | .070 |
| 14 | 13 | .719 | .726 | -0.226 | .821 | .917 | -.070 | .056 |
| 15 | 14 | .710 | .719 | -0.274 | .784 | .917 | -.073 | .055 |
| 16 | 15 | .723 | .710 | 0.385 | .700 | .917 | -.051 | .076 |
| 17 | 16 | .728 | .723 | 0.165 | .869 | .917 | -.057 | .067 |
| 18 | 17 | .737 | .728 | 0.307 | .759 | .917 | -.051 | .070 |
| 19 | 18 | .725 | .737 | -0.397 | .692 | .917 | -.073 | .048 |
| 20 | 19 | .729 | .725 | 0.113 | .910 | .917 | -.058 | .065 |

*Notes*. *shows Zou's confidence intervals for correlation differences (significant when zero falls outside the interval, shown in bold). "pFisher" shows unadjusted p-values from Fisher's r-to-z transformation test, while "pFisher.BH" shows these p-values after Benjamini-Hochberg correction for multiple comparisons (p significant at <.05, shown in bold).

Supplemental Table 8 Comparison of PHQ-9 correlations across NROs with concurrent PANAS Negative Affect

| Response scale width  (Scale 1 - Scale 2) | | r1 | r2 | zFisher | pFisher | pFisher.BH | 95% CI Zou* | |
| --- | --- | --- | --- | --- | --- | --- | --- | --- |
| Lower | Upper |
| 3 | 2 | .655 | .611 | 1.096 | .273 | .932 | -.035 | .123 |
| 4 | 2 | .684 | .611 | 1.883 | .060 | .418 | -.003 | .149 |
| 4 | 3 | .684 | .655 | 0.779 | .436 | .939 | -.044 | .101 |
| 5 | 2 | .717 | .611 | 2.860 | **.004** | .119 | **.033** | **.180** |
| 5 | 3 | .717 | .655 | 1.754 | .079 | .445 | -.007 | .132 |
| 5 | 4 | .717 | .684 | 0.981 | .326 | .932 | -.033 | .100 |
| 6 | 2 | .689 | .611 | 2.024 | **.043** | .401 | .002 | .154 |
| 6 | 3 | .689 | .655 | 0.919 | .358 | .932 | -.038 | .106 |
| 6 | 4 | .689 | .684 | 0.141 | .888 | 1.000 | -.064 | .074 |
| 6 | 5 | .689 | .717 | -0.841 | .400 | .934 | -.095 | .038 |
| 7 | 2 | .706 | .611 | 2.538 | **.011** | .156 | **.022** | **.170** |
| 7 | 3 | .706 | .655 | 1.429 | .153 | .714 | -.019 | .122 |
| 7 | 4 | .706 | .684 | 0.652 | .514 | .939 | -.045 | .090 |
| 7 | 5 | .706 | .717 | -0.332 | .740 | .979 | -.075 | .054 |
| 7 | 6 | .706 | .689 | 0.511 | .609 | .973 | -.049 | .085 |
| 8 | 7 | .705 | .706 | -0.029 | .977 | 1.000 | -.066 | .064 |
| 9 | 8 | .734 | .705 | 0.904 | .366 | .932 | -.034 | .093 |
| 10 | 9 | .695 | .734 | -1.184 | .236 | .932 | -.104 | .025 |
| 11 | 10 | .706 | .695 | 0.316 | .752 | .979 | -.056 | .078 |
| 12 | 11 | .685 | .706 | -0.618 | .537 | .939 | -.090 | .047 |
| 13 | 12 | .698 | .685 | 0.363 | .717 | .979 | -.056 | .082 |
| 14 | 13 | .707 | .698 | 0.293 | .769 | .979 | -.057 | .077 |
| 15 | 14 | .708 | .707 | 0.003 | .998 | 1.000 | -.065 | .066 |
| 16 | 15 | .708 | .708 | 0.000 | 1.000 | 1.000 | -.065 | .065 |
| 17 | 16 | .723 | .708 | 0.489 | .625 | .973 | -.048 | .080 |
| 18 | 17 | .702 | .723 | -0.656 | .512 | .939 | -.086 | .043 |
| 19 | 18 | .705 | .702 | 0.089 | .929 | 1.000 | -.063 | .069 |
| 20 | 19 | .700 | .705 | -0.160 | .873 | 1.000 | -.072 | .061 |

*Notes*. *shows Zou's confidence intervals for correlation differences (significant when zero falls outside the interval, shown in bold). "pFisher" shows unadjusted p-values from Fisher's r-to-z transformation test, while "pFisher.BH" shows these p-values after Benjamini-Hochberg correction for multiple comparisons (p significant at <.05, shown in bold).

Supplemental Table 9 Comparison of PHQ-9 correlations across NROs with baseline PANAS Negative Affect

| Response scale width  (Scale 1 - Scale 2) | | r1 | r2 | zFisher | pFisher | pFisher.BH | 95% CI Zou* | |
| --- | --- | --- | --- | --- | --- | --- | --- | --- |
| Lower | Upper |
| 3 | 2 | .655 | .611 | 1.096 | .273 | .932 | -.035 | .123 |
| 4 | 2 | .684 | .611 | 1.883 | .060 | .418 | -.003 | .149 |
| 4 | 3 | .684 | .655 | 0.779 | .436 | .939 | -.044 | .101 |
| 5 | 2 | .717 | .611 | 2.860 | **.004** | .119 | **.033** | **.180** |
| 5 | 3 | .717 | .655 | 1.754 | .079 | .445 | -.007 | .132 |
| 5 | 4 | .717 | .684 | 0.981 | .326 | .932 | -.033 | .100 |
| 6 | 2 | .689 | .611 | 2.024 | **.043** | .401 | .002 | .154 |
| 6 | 3 | .689 | .655 | 0.919 | .358 | .932 | -.038 | .106 |
| 6 | 4 | .689 | .684 | 0.141 | .888 | 1.000 | -.064 | .074 |
| 6 | 5 | .689 | .717 | -0.841 | .400 | .934 | -.095 | .038 |
| 7 | 2 | .706 | .611 | 2.538 | **.011** | .156 | **.022** | **.170** |
| 7 | 3 | .706 | .655 | 1.429 | .153 | .714 | -.019 | .122 |
| 7 | 4 | .706 | .684 | 0.652 | .514 | .939 | -.045 | .090 |
| 7 | 5 | .706 | .717 | -0.332 | .740 | .979 | -.075 | .054 |
| 7 | 6 | .706 | .689 | 0.511 | .609 | .973 | -.049 | .085 |
| 8 | 7 | .705 | .706 | -0.029 | .977 | 1.000 | -.066 | .064 |
| 9 | 8 | .734 | .705 | 0.904 | .366 | .932 | -.034 | .093 |
| 10 | 9 | .695 | .734 | -1.184 | .236 | .932 | -.104 | .025 |
| 11 | 10 | .706 | .695 | 0.316 | .752 | .979 | -.056 | .078 |
| 12 | 11 | .685 | .706 | -0.618 | .537 | .939 | -.090 | .047 |
| 13 | 12 | .698 | .685 | 0.363 | .717 | .979 | -.056 | .082 |
| 14 | 13 | .707 | .698 | 0.293 | .769 | .979 | -.057 | .077 |
| 15 | 14 | .708 | .707 | 0.003 | .998 | 1.000 | -.065 | .066 |
| 16 | 15 | .708 | .708 | 0.000 | 1.000 | 1.000 | -.065 | .065 |
| 17 | 16 | .723 | .708 | 0.489 | .625 | .973 | -.048 | .080 |
| 18 | 17 | .702 | .723 | -0.656 | .512 | .939 | -.086 | .043 |
| 19 | 18 | .705 | .702 | 0.089 | .929 | 1.000 | -.063 | .069 |
| 20 | 19 | .700 | .705 | -0.160 | .873 | 1.000 | -.072 | .061 |

*Notes*. *shows Zou's confidence intervals for correlation differences (significant when zero falls outside the interval, shown in bold). "pFisher" shows unadjusted p-values from Fisher's r-to-z transformation test, while "pFisher.BH" shows these p-values after Benjamini-Hochberg correction for multiple comparisons (p significant at <.05, shown in bold).

Supplemental Table 10 Comparison of PHQ-9 correlations across NROs with concurrent PANAS Positive Affect

| Response scale width  (Scale 1 - Scale 2) | | r1 | r2 | zFisher | pFisher | pFisher.BH | 95% CI Zou* | |
| --- | --- | --- | --- | --- | --- | --- | --- | --- |
| Lower | Upper |
| 3 | 2 | -.466 | -.445 | -0.395 | .693 | .917 | -.125 | .083 |
| 4 | 2 | -.529 | -.445 | -1.659 | .097 | .907 | -.184 | .015 |
| 4 | 3 | -.529 | -.466 | -1.257 | .209 | .917 | -.162 | .035 |
| 5 | 2 | -.474 | -.445 | -0.552 | .581 | .917 | -.132 | .074 |
| 5 | 3 | -.474 | -.466 | -0.155 | .877 | .982 | -.110 | .094 |
| 5 | 4 | -.474 | -.529 | 1.106 | .269 | .917 | -.042 | .153 |
| 6 | 2 | -.441 | -.445 | 0.079 | .937 | .984 | -.101 | .109 |
| 6 | 3 | -.441 | -.466 | 0.475 | .635 | .917 | -.079 | .129 |
| 6 | 4 | -.441 | -.529 | 1.742 | .082 | .907 | -.011 | .188 |
| 6 | 5 | -.441 | -.474 | 0.633 | .527 | .917 | -.070 | .136 |
| 7 | 2 | -.488 | -.445 | -0.832 | .405 | .917 | -.145 | .059 |
| 7 | 3 | -.488 | -.466 | -0.433 | .665 | .917 | -.123 | .079 |
| 7 | 4 | -.488 | -.529 | 0.832 | .406 | .917 | -.055 | .137 |
| 7 | 5 | -.488 | -.474 | -0.278 | .781 | .917 | -.114 | .086 |
| 7 | 6 | -.488 | -.441 | -0.914 | .361 | .917 | -.149 | .054 |
| 8 | 7 | -.448 | -.488 | 0.769 | .442 | .917 | -.062 | .141 |
| 9 | 8 | -.471 | -.448 | -0.428 | .669 | .917 | -.126 | .081 |
| 10 | 9 | -.437 | -.471 | 0.640 | .522 | .917 | -.070 | .139 |
| 11 | 10 | -.530 | -.437 | -1.804 | .071 | .907 | -.193 | .008 |
| 12 | 11 | -.505 | -.530 | 0.498 | .619 | .917 | -.072 | .121 |
| 13 | 12 | -.464 | -.505 | 0.804 | .421 | .917 | -.059 | .142 |
| 14 | 13 | -.478 | -.464 | -0.277 | .782 | .917 | -.117 | .088 |
| 15 | 14 | -.464 | -.478 | 0.279 | .781 | .917 | -.087 | .116 |
| 16 | 15 | -.407 | -.464 | 1.045 | .296 | .917 | -.049 | .162 |
| 17 | 16 | -.426 | -.407 | -0.339 | .735 | .917 | -.127 | .089 |
| 18 | 17 | -.441 | -.426 | -0.271 | .786 | .917 | -.120 | .091 |
| 19 | 18 | -.443 | -.441 | -0.039 | .969 | .984 | -.107 | .103 |
| 20 | 19 | -.444 | -.443 | -0.020 | .984 | .984 | -.106 | .104 |

*Notes*. *shows Zou's confidence intervals for correlation differences (significant when zero falls outside the interval, shown in bold). "pFisher" shows unadjusted p-values from Fisher's r-to-z transformation test, while "pFisher.BH" shows these p-values after Benjamini-Hochberg correction for multiple comparisons (p significant at <.05, shown in bold).

Supplemental Table 11 Comparison of PHQ-9 correlations across NROs with baseline PANAS Positive Affect

| Response scale width  (Scale 1 - Scale 2) | | r1 | r2 | zFisher | pFisher | pFisher.BH | 95% CI Zou* | |
| --- | --- | --- | --- | --- | --- | --- | --- | --- |
| Lower | Upper |
| 3 | 2 | -.383 | -.374 | -0.172 | .864 | .970 | -.122 | .102 |
| 4 | 2 | -.467 | -.374 | -1.711 | .087 | .584 | -.201 | .014 |
| 4 | 3 | -.467 | -.383 | -1.534 | .125 | .584 | -.191 | .023 |
| 5 | 2 | -.473 | -.374 | -1.822 | .069 | .584 | -.206 | .008 |
| 5 | 3 | -.473 | -.383 | -1.644 | .100 | .584 | -.196 | .017 |
| 5 | 4 | -.473 | -.467 | -0.112 | .911 | .970 | -.107 | .096 |
| 6 | 2 | -.420 | -.374 | -0.836 | .403 | .941 | -.156 | .063 |
| 6 | 3 | -.420 | -.383 | -0.661 | .509 | .950 | -.147 | .073 |
| 6 | 4 | -.420 | -.467 | 0.878 | .380 | .941 | -.058 | .151 |
| 6 | 5 | -.420 | -.473 | 0.990 | .322 | .941 | -.052 | .157 |
| 7 | 2 | -.468 | -.374 | -1.737 | .082 | .584 | -.202 | .012 |
| 7 | 3 | -.468 | -.383 | -1.559 | .119 | .584 | -.192 | .022 |
| 7 | 4 | -.468 | -.467 | -0.022 | .982 | .982 | -.103 | .100 |
| 7 | 5 | -.468 | -.473 | 0.090 | .928 | .970 | -.097 | .106 |
| 7 | 6 | -.468 | -.420 | -0.903 | .367 | .941 | -.152 | .056 |
| 8 | 7 | -.420 | -.468 | 0.915 | .360 | .941 | -.056 | .153 |
| 9 | 8 | -.439 | -.420 | -0.356 | .722 | .970 | -.126 | .087 |
| 10 | 9 | -.444 | -.439 | -0.081 | .935 | .970 | -.110 | .102 |
| 11 | 10 | -.481 | -.444 | -0.719 | .472 | .950 | -.141 | .065 |
| 12 | 11 | -.422 | -.481 | 1.118 | .263 | .941 | -.045 | .164 |
| 13 | 12 | -.446 | -.422 | -0.440 | .660 | .970 | -.131 | .083 |
| 14 | 13 | -.427 | -.446 | 0.343 | .732 | .970 | -.088 | .125 |
| 15 | 14 | -.414 | -.427 | 0.245 | .807 | .970 | -.094 | .121 |
| 16 | 15 | -.406 | -.414 | 0.132 | .895 | .970 | -.101 | .116 |
| 17 | 16 | -.428 | -.406 | -0.385 | .700 | .970 | -.129 | .087 |
| 18 | 17 | -.438 | -.428 | -0.193 | .847 | .970 | -.116 | .095 |
| 19 | 18 | -.444 | -.438 | -0.115 | .909 | .970 | -.111 | .099 |
| 20 | 19 | -.407 | -.444 | 0.685 | .493 | .950 | -.070 | .144 |

*Notes*. *shows Zou's confidence intervals for correlation differences (significant when zero falls outside the interval, shown in bold). "pFisher" shows unadjusted p-values from Fisher's r-to-z transformation test, while "pFisher.BH" shows these p-values after Benjamini-Hochberg correction for multiple comparisons (p significant at <.05, shown in bold).
